# Supplementary material
Source: bioRxiv or medRxiv preprint supplement (http://www.medrxiv.org/highwire/filestream/74257/field_highwire_adjunct_files/0/2020.03.24.20042382-1.pdf)
Supplement: Supplementary file [file 2020.03.24.20042382-1.pdf]

## Supplemental Files

This file has been provided by the authors to give readers additional information about their work.

Supplement to: Tan WT, Lu Y, Zhang J, et al. Viral Kinetics and Antibody Responses in Patients with COVID-19. Manuscript submitted to *the BMJ*.

## Supplementary Files: Table of Contents

| <b>1. Supplementary Figures</b> |                                                                                                                                                    |         |
|---------------------------------|----------------------------------------------------------------------------------------------------------------------------------------------------|---------|
| Supplementary Figure 1          | Study design and the analysis flow diagram                                                                                                         | page 3  |
| Supplementary Figure 2          | Date of symptoms onset in our cohort of 67 patients with SARS-CoV-2 infected                                                                       | page 4  |
| Supplementary Figure 3          | Incubation period in different gender and age group                                                                                                | page 5  |
| Supplementary Figure 4          | Distribution of the key time-to-event relating to epidemic identification and disease process                                                      | page 6  |
| Supplementary Figure 5          | Standard curve of relationship between viral loads and Ct value                                                                                    | page 7  |
| Supplementary Figure 6          | Comparison of SARS-CoV-2 shedding in nasopharyngeal swab and sputum                                                                                | page 8  |
| Supplementary Figure 7          | Comparison of viral shedding time in severe and non-severe COVID-19 patients                                                                       | page 9  |
| Supplementary Figure 8          | SARS-CoV-2 detection in urine and blood, and the details of patients who were confirmed by other type of specimens rather than nasopharyngeal swab | page 10 |
| <b>2. Supplementary Tables</b>  |                                                                                                                                                    |         |
| Supplementary Table 1           | Key time-to-events distribution in patients with COVID-19                                                                                          | page 11 |
| Supplementary Table 2           | Clinical and radiographic characteristics of the study patients                                                                                    | page 12 |
| Supplementary Table 3           | Laboratory findings                                                                                                                                | page 13 |
| Supplementary Table 4           | Complications, Treatments, and Clinical Outcomes                                                                                                   | page 14 |

**Supplementary Figure 1. Study design and the analysis flow diagram.**

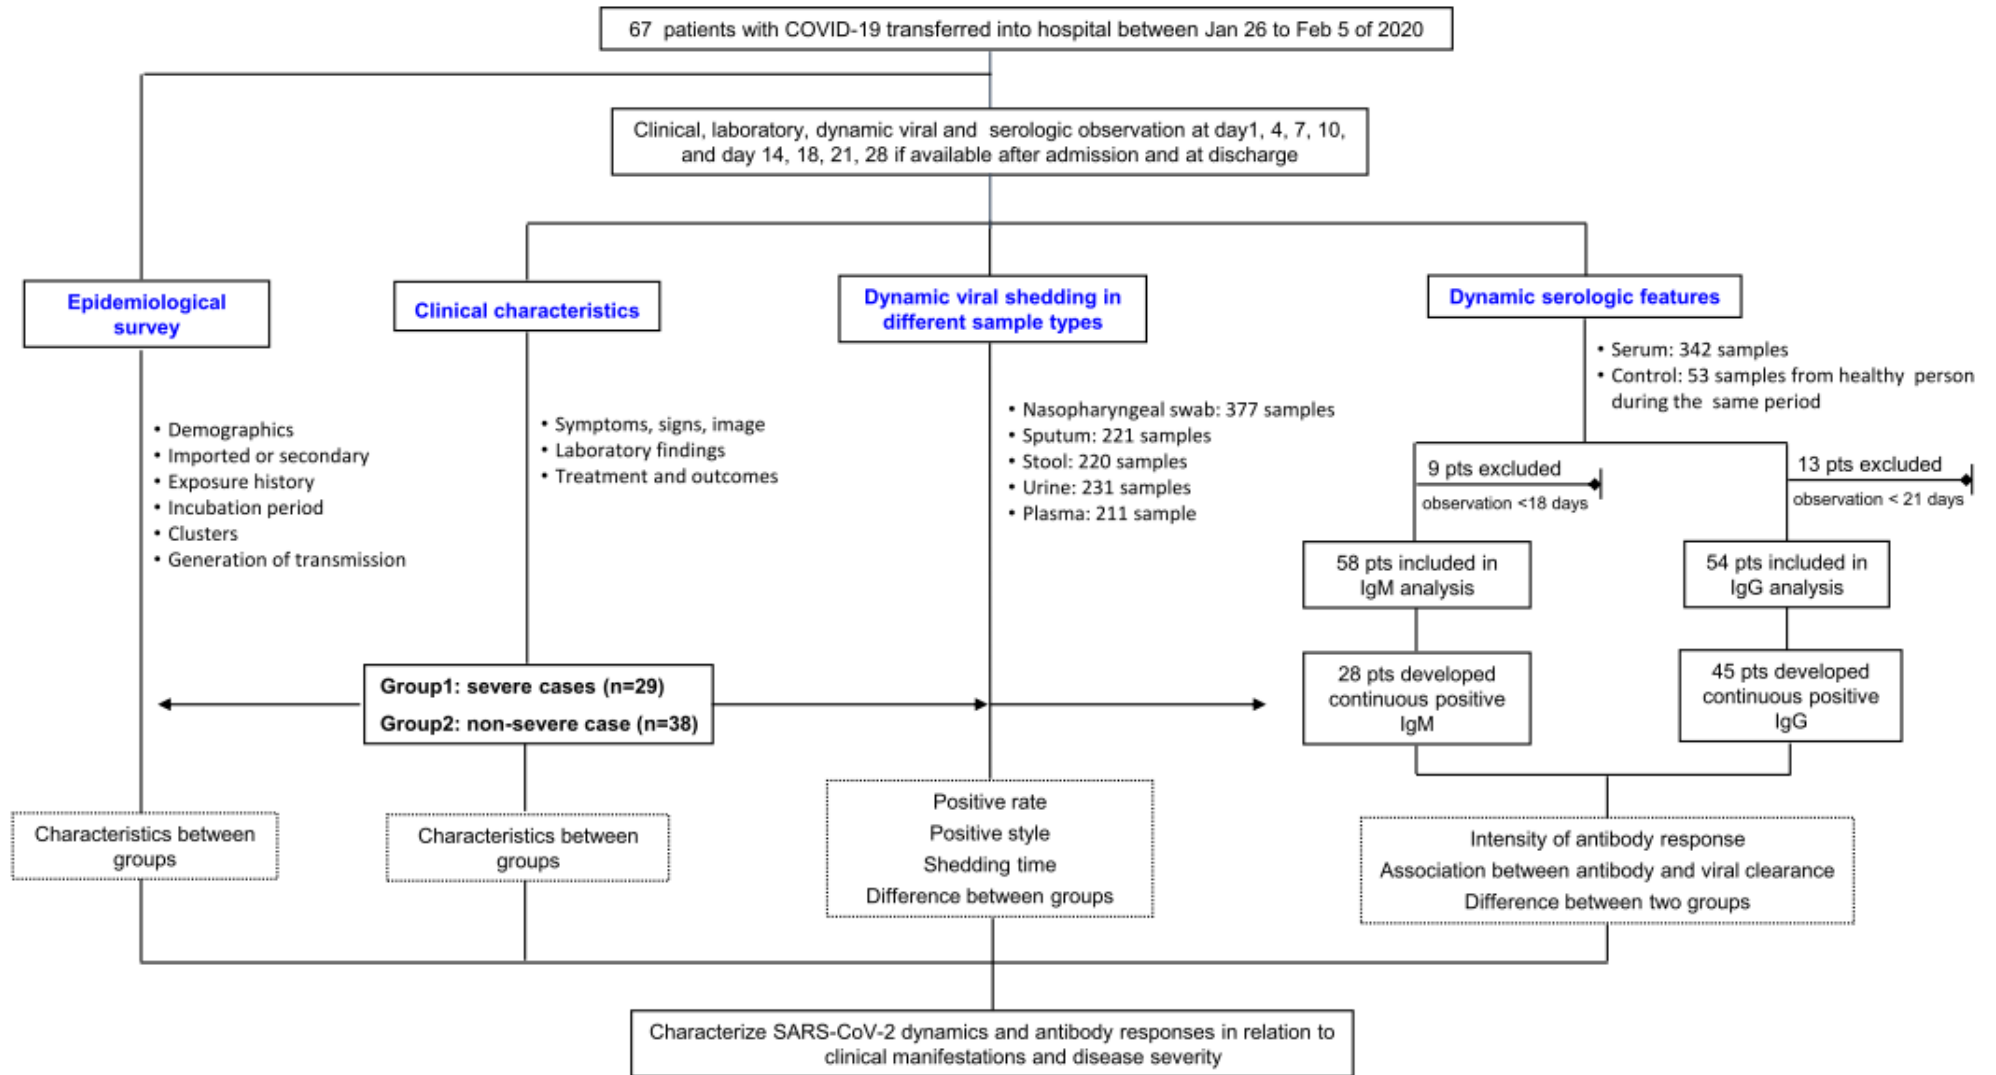

**Supplementary Figure 2.** Date of symptoms onset in our cohort of 67 patients with SARS-CoV-2 infected from Chongqing, China.

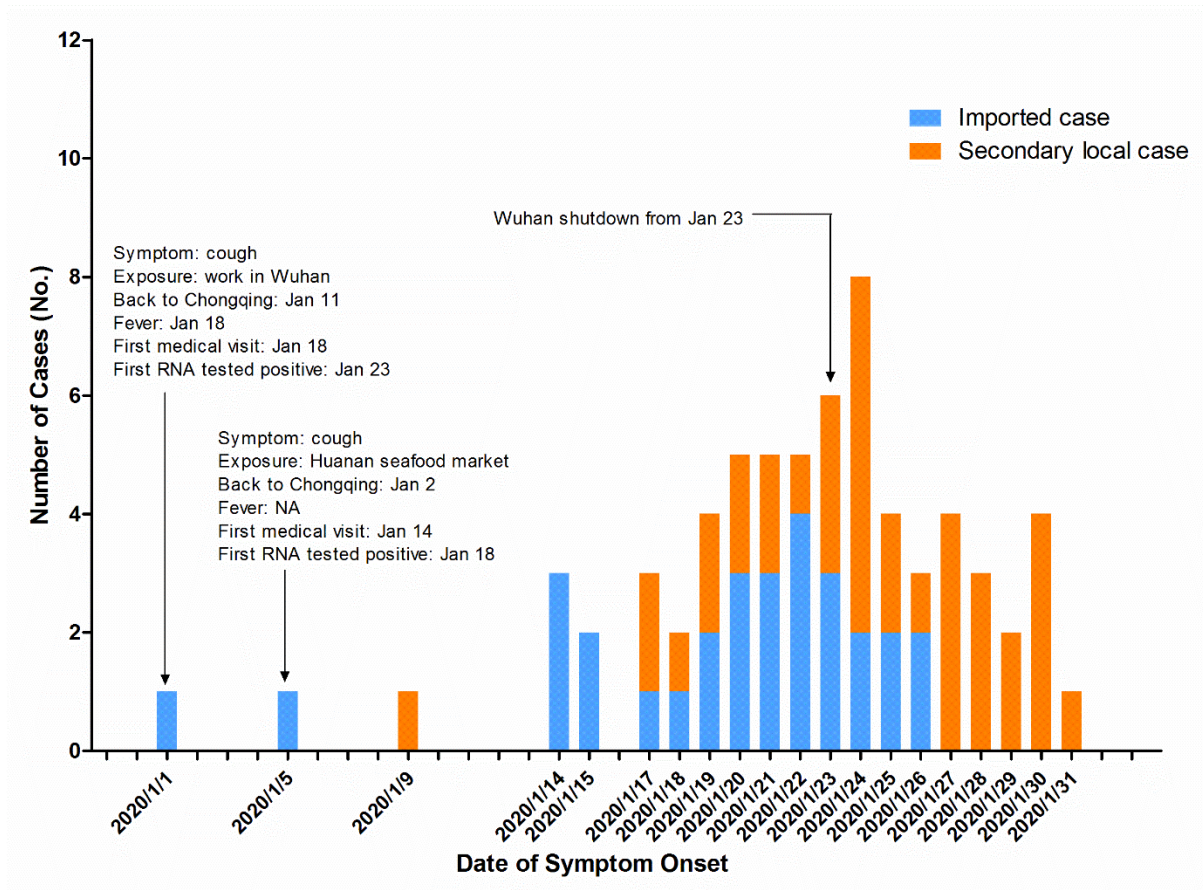

**Supplementary Figure 3.** Incubation period in different gender and age group. (A) The mean incubation duration for male was  $7.3 \pm 3.1$  days, and that was  $5.7 \pm 3.0$  for female ( $p = 0.054$ ). (B) The mean incubation duration for 10-18yr, 19-45yrs, 46-65yrs and 66-77yrs group were  $12.0 \pm 2.7$ ,  $6.3 \pm 3.0$ ,  $6.8 \pm 3.0$  and  $5.6 \pm 2.5$  days, respectively. Children have a prolonged incubation period compared with other three age group ( $p < 0.01$ ).

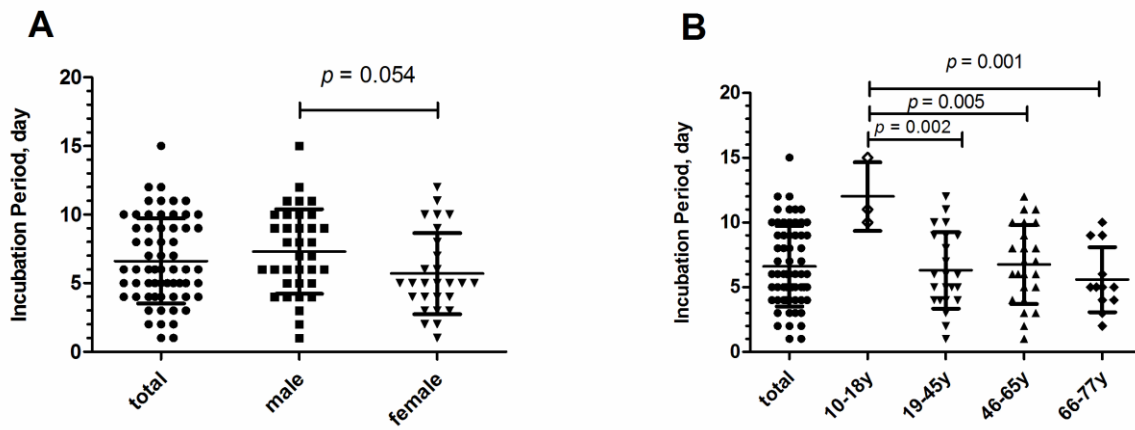

**Supplementary Figure 4.** Distribution of the key time-to-event relating to epidemic identification and disease process. The key time-to-events distribution were estimated by one-sample Kolmogorov-Smirnov test on a given day for each category shown. The incubation period, interval days from symptom onset to first medical visit, and the duration of disease course (i.e. days from onset to be discharged) were estimated by fitting a Gamma-distribution. The days from symptom onset to be conformed, fever Period, and hospitalization days fit a Weibull-distribution. The distribution of the duration of disease course, conformation, and hospitalization were significantly longer in severe patients than that in non-severe patients ( $p < 0.05$ ).

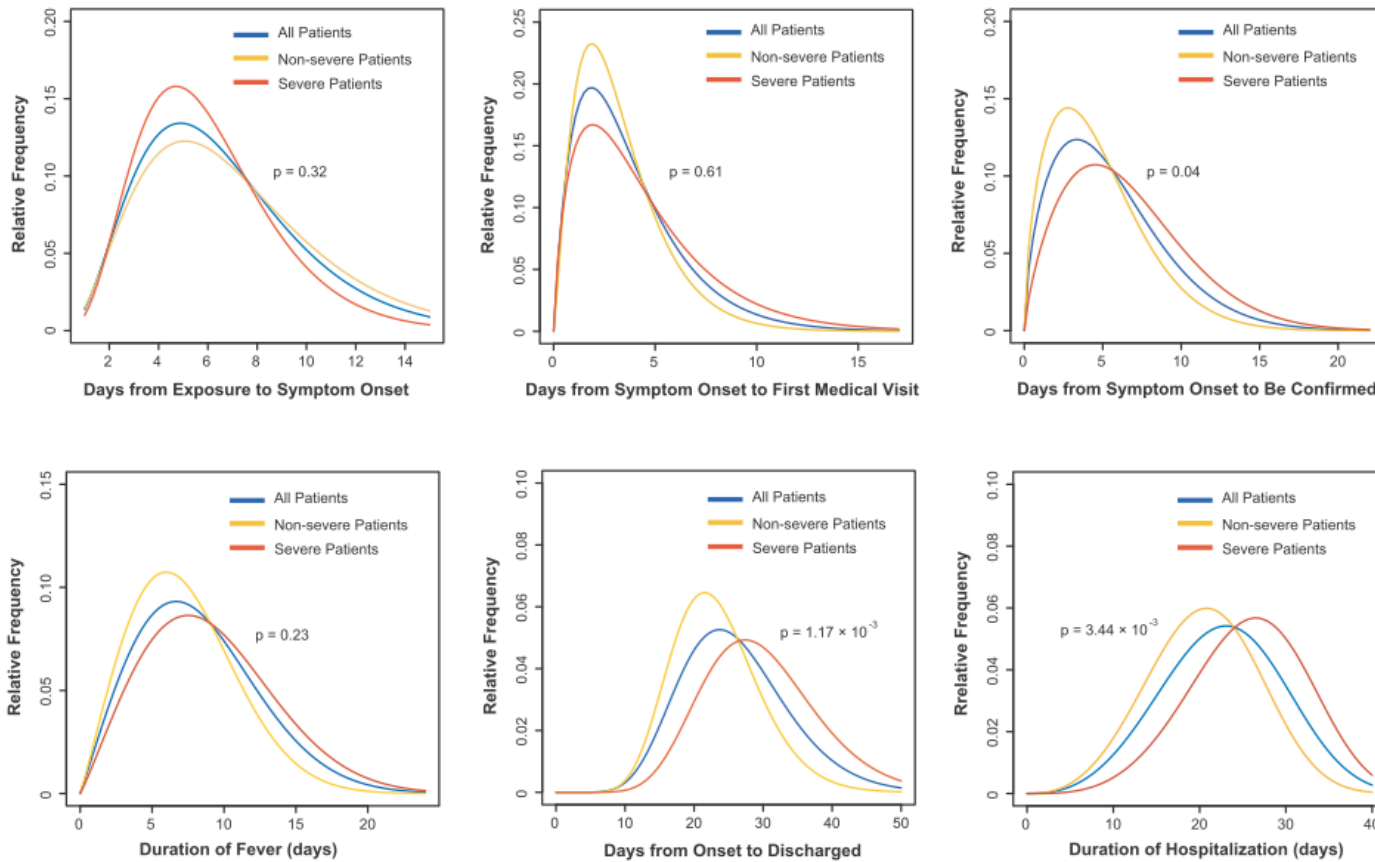

**Supplementary Figure 5.** Standard curve of relationship between viral loads and  $C_t$  value. The viral RNA copy numbers are inversely related to  $C_t$  values with  $C_t$  values of 13.85, 19.39, 25.68, 29.20, 33.61, and 38.87 and corresponding to  $2.25 \times 10^9$ ,  $2.25 \times 10^8$ ,  $2.25 \times 10^7$ ,  $2.25 \times 10^6$ ,  $2.25 \times 10^5$ , and  $1.5 \times 10^4$  copies per milliliter.

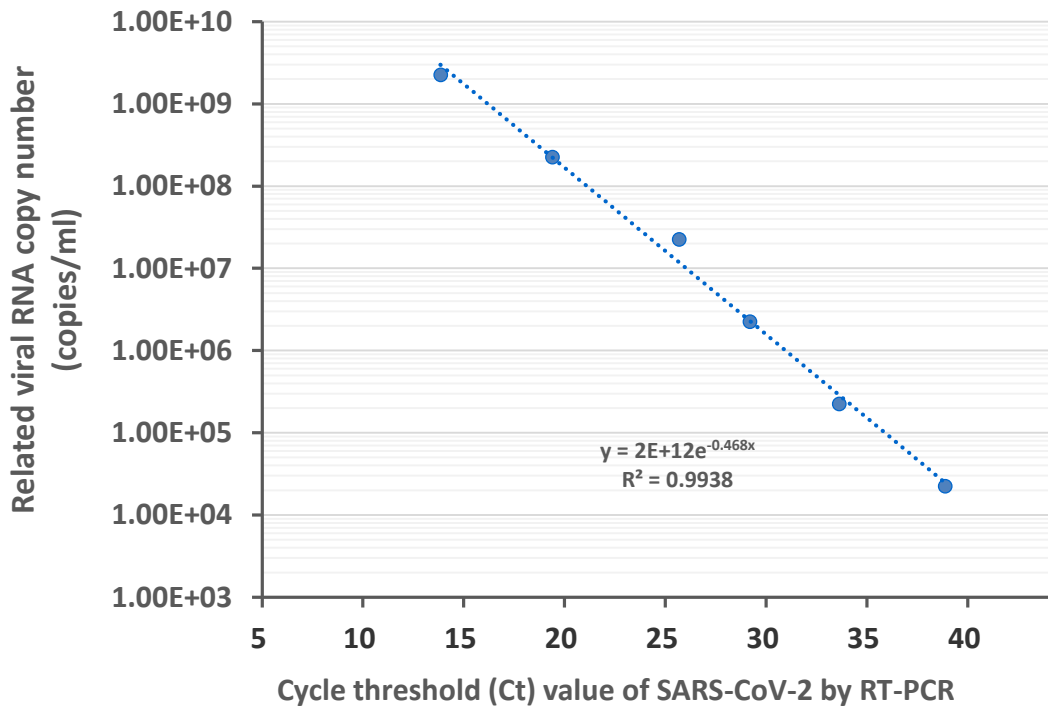

**Supplementary Figure 6.** Comparison of SARS-CoV-2 shedding in nasopharyngeal swab and sputum. Sputum have a longer shedding (mean  $22.0 \pm 6.7$  days) compared with that in nasopharyngeal swabs in 40 patients from the cohort with continuous samples both for sputum and nasopharyngeal swabs (mean  $16.2 \pm 7.2$  days,  $p = 4.28 \times 10^{-7}$ ). The symbol with error bar denoted the mean and its standard deviation of viral shedding time.

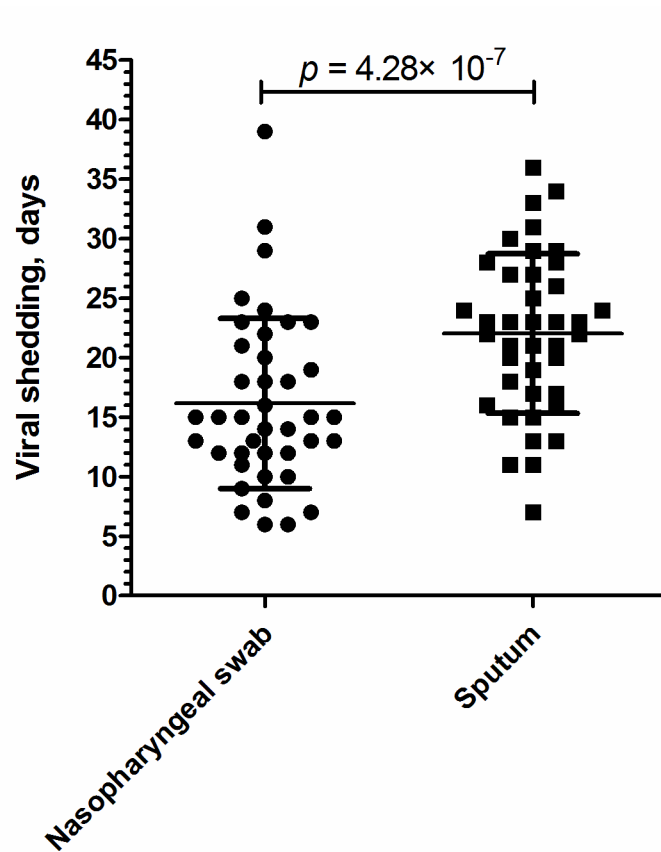



**Supplementary Figure 7.** Comparison of viral shedding time in severe and non-severe COVID-19 patients. The dashed lines together with the arrows indicate an example at day 21 from illness onset.

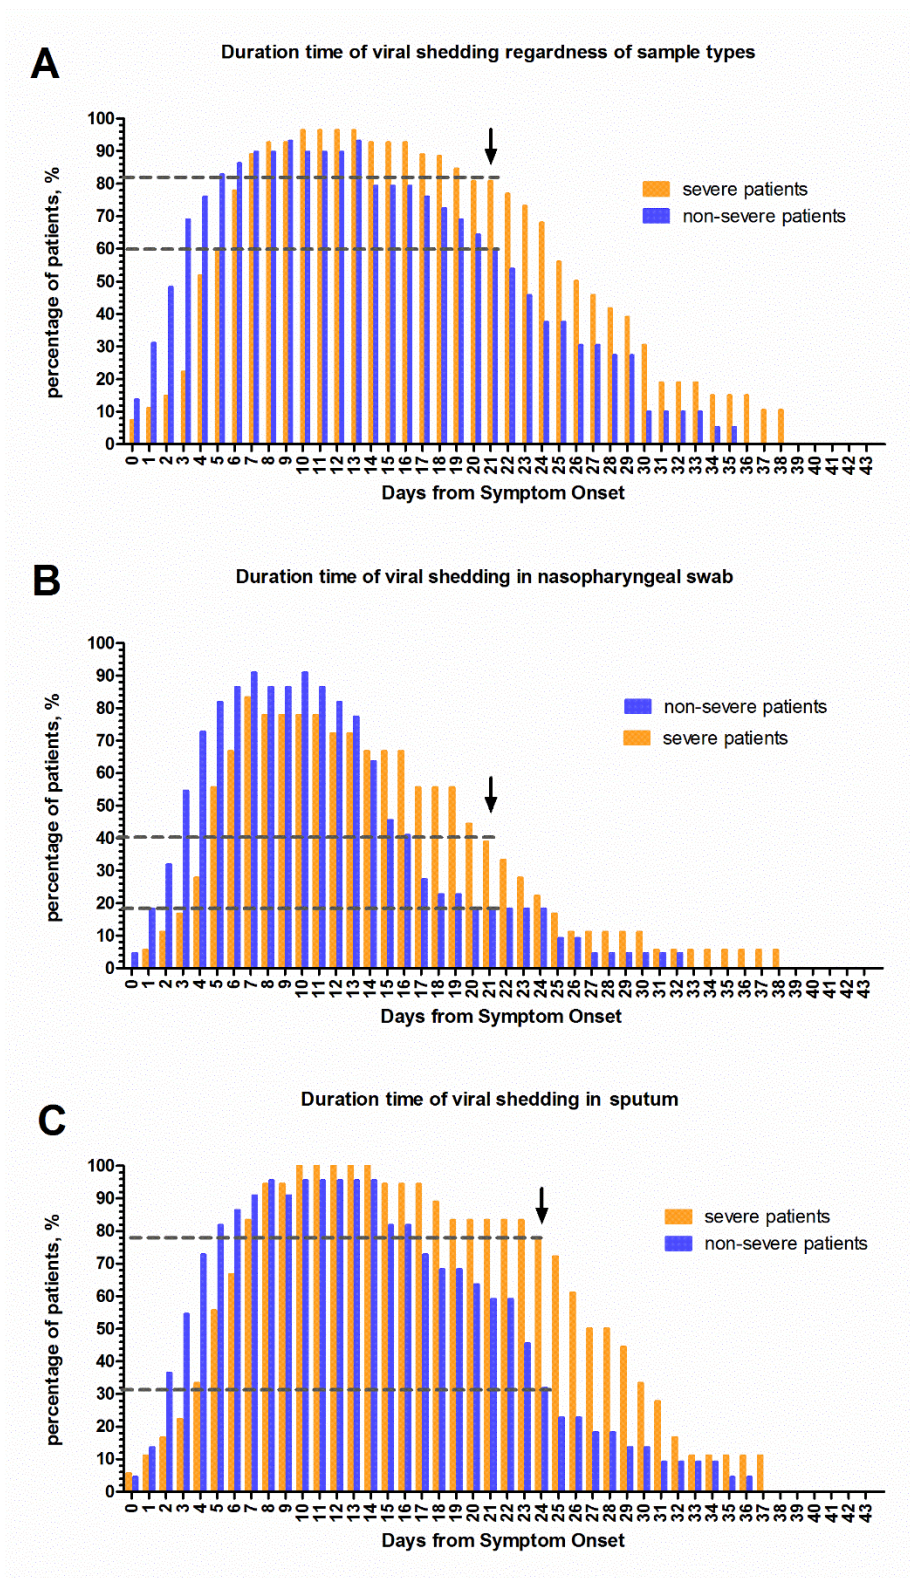

**Supplementary Figure 8.** SARS-CoV-2 detection in urine and blood, and the details of patients who were confirmed by other type of specimens rather than nasopharyngeal swab (NS). 13 urines from 12 patients (Panel A) and 12 plasmas from 9 patients (Panel B) were positive for SARS-CoV-2 RNA. Panel C shows the comparison of kidney functions at the urine viral positive and negative time-points. Only one patient was positive both in urine and plasma (Patient 62). Panel D shows six patients who were confirmed as COVID-19 via viral positive in sputum (patient 4, 26, 50), BALF (Patient 12), and/or stools (patient 71, 50, and 66), while their NS were negative for SARS-CoV-2 RNA at the confirmative time-points. Two of them developed NS-positive during the course (Patient 4 and 71), and the other four were still negative in NS in the next continuously dynamic RNA test. X shape symbol indicate the confirmation test.

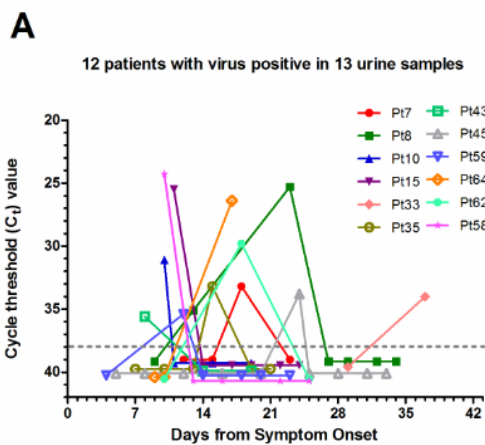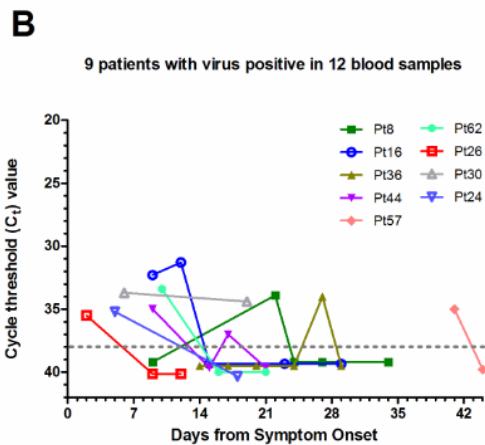

**C**

Renal function at the time point that virus positive in urine

| Renal function test                         | positive point (n=13) | negative point (n=195) |
|---------------------------------------------|-----------------------|------------------------|
| Fasting blood-glucose — mmol/L              | 6.0 ± 2.3             | 5.9 ± 1.4              |
| Serum uric acid — μmol/L                    | 312.6 ± 115.6         | 338.9 ± 382.0          |
| Serum urea nitrogen — mmol/L                | 4.8 ± 1.5             | 4.3 ± 2.3              |
| Serum creatinine — μmol/L                   | 74.2 ± 19.5           | 70.2 ± 25.6            |
| Estimated glomerular filtration rate (eGFR) | 91.5 ± 20.5           | 100.2 ± 22.5           |

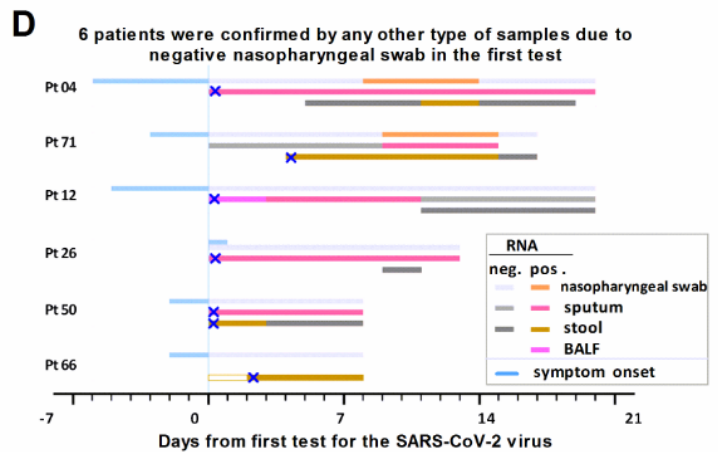

**Supplementary Table 1.** Key time-to-events distribution in patients with COVID-19.

| Key time to events                            | All patients (n=67) |                | Severe patients (n=29) |                | non-Severe patients (n=38) |                | p-value |
|-----------------------------------------------|---------------------|----------------|------------------------|----------------|----------------------------|----------------|---------|
|                                               | N                   | Median (range) | n                      | Median (range) | n                          | Median (range) |         |
| Days from explore to symptom onset            | 62                  | 6 (1-15)       | 26                     | 5.5 (1-11)     | 36                         | 7 (1-15)       | 0.279   |
| Days from onset to first medical visit        | 67                  | 2 (0-17)       | 29                     | 3 (1-17)       | 38                         | 2 (1-11)       | 0.266   |
| Days from onset to be conformed               | 67                  | 4 (0-22)       | 29                     | 5 (0-22)       | 38                         | 3 (1-15)       | 0.01    |
| Interval of first visit to confirmation, days | 67                  | 1.0 (0-9)      | 29                     | 2 (0-9)        | 38                         | 0 (0-8)        | 0.049   |
| Days from explore to fever onset *            | 46                  | 7 (0-17)       | 25                     | 5 (2-17)       | 21                         | 7 (0-12)       | 0.287   |
| Fever period, days #                          | 49                  | 8 (2-24)       | 27                     | 8 (3-24)       | 22                         | 6 (2-16)       | 0.143   |
| Days from onset to hospitalized               | 67                  | 3 (0-17)       | 29                     | 3 (0-17)       | 38                         | 2 (0-13)       | 0.06    |
| Days from onset to discharged                 | 67                  | 25 (12-44)     | 29                     | 30 (12-44)     | 38                         | 22 (12-38)     | 0.0008  |
| Duration of hospitalization, days             | 67                  | 22 (9-38)      | 29                     | 27 (11-38)     | 38                         | 20 (9-33)      | 0.003   |

\*For patients with fever before admission; # include 3 more patients developed fever after admission.

**Supplementary Table 2.** Clinical and radiographic characteristics of the study patients.

|                                                                | All patients<br>(n=67) | Severe patients<br>(n=29) | non-Severe<br>patients (n=38) | p-value                |
|----------------------------------------------------------------|------------------------|---------------------------|-------------------------------|------------------------|
| <b>Signs</b>                                                   |                        |                           |                               |                        |
| Highest respiratory rate , bpm                                 | 21.5 ±2.4              | 23.0 ±2.9                 | 20.4 ±1.1                     | 4.21×10 <sup>-5</sup>  |
| Respiratory rate >24 bpm                                       | 10/67 (14.9)           | 9/29 (31.0)               | 1/38 (2.6)                    | 0.002                  |
| Lowest oxygenation index (PaO <sub>2</sub> /FiO <sub>2</sub> ) | 307.7 ±115.5           | 204.93 ±50.5              | 410.5 ±52.1                   | 1.32×10 <sup>-21</sup> |
| Heart rate, pulse per min                                      | 91.3 ±12.2             | 90.6 ±12.1                | 91.9 ±12.4                    | 0.689                  |
| Systolic blood pressure, mmHg                                  | 127.4 ±18.1            | 130.4 ±19.1               | 125.0 ±17.2                   | 0.24                   |
| Diastolic blood pressure, mmHg                                 | 78.1 ±11.3             | 77.6 ±11.9                | 78.5 ±11.1                    | 0.774                  |
| Fever#                                                         | 49/67 (73.1)           | 27/29 (93.1)              | 22/38 (57.9)                  | 0.002                  |
| Highest temperature, °C                                        |                        |                           |                               | 0.006                  |
| <37.3                                                          | 18/66 (27.3)           | 2/28 (7.1)                | 16/38 (42.1)                  |                        |
| 37.3-38.0                                                      | 22/66 (33.3)           | 10/28 (35.7)              | 12/38 (31.6)                  |                        |
| 38.1-39.0                                                      | 23/66 (34.8)           | 15/28 (53.6)              | 8/38 (21.1)                   |                        |
| >39.0                                                          | 3/66 (4.5)             | 1/28 (3.6)                | 2/38 (5.3)                    |                        |
| Abnormal breath sounds                                         | 12/67 (17.9)           | 8/29 (27.6)               | 4/38 (10.5)                   | 0.071                  |
| <b>Symptoms during the course #</b>                            |                        |                           |                               |                        |
| Fatigue                                                        | 22/67 (32.8)           | 12/29 (41.4)              | 10/38 (26.3)                  | 0.193                  |
| Anorexia                                                       | 7/67 (10.4)            | 3/29 (10.3)               | 4/38 (10.5)                   | 0.981                  |
| Cough                                                          | 65/67 (97.0)           | 29/29 (100.0)             | 36/38 (94.7)                  | 0.21                   |
| Hemoptysis                                                     | 2/67 (3.0)             | 2/67 (3.0)                | 0                             | 0.184                  |
| Chest tightness                                                | 9/67 (13.4)            | 7/29 (24.1)               | 2/38 (5.3)                    | 0.034                  |
| Polypnea                                                       | 33/67 (49.3)           | 23/29 (79.3)              | 10/38 (26.3)                  | 1.72×10 <sup>-5</sup>  |
| Pharyngalgia                                                   | 8/67 (11.9)            | 4/29 (13.8)               | 4/38 (10.5)                   | 0.683                  |
| Headache                                                       | 7/67 (10.4)            | 3/29 (10.3)               | 4/38 (10.5)                   | 1                      |
| Muscle Soreness                                                | 6/67 (9.0)             | 2/29 (6.9)                | 4/38 (10.5)                   | 0.606                  |
| Vomit                                                          | 3/67 (4.5)             | 0                         | 3/35 (8.6)                    | 0.252                  |
| Diarrhea                                                       | 15/67 (22.4)           | 6/29 (20.7)               | 9/38 (23.7)                   | 0.771                  |
| <b>Chest CT scans</b>                                          |                        |                           |                               |                        |
| Present abnormalities of lung                                  | 64/67 (95.5)           | 29/29 (100.0)             | 35/38 (92.1)                  | 0.252                  |
| Location of lesion                                             |                        |                           |                               | 0.013                  |
| Both lungs                                                     | 43/64 (67.2)           | 25/29 (86.2)              | 18/35 (51.4)                  | 0.003                  |
| Partial lobe of both side                                      | 6/64 (9.4)             | 2/29 (6.9)                | 4/35 (11.4)                   | 0.536                  |
| Partial lobe of right lung                                     | 10/64 (15.6)           | 1/29 (3.4)                | 9/35 (25.7)                   | 0.017                  |
| Partial lobe of left lung                                      | 4/64 (6.3)             | 0                         | 4/35 (11.4)                   | 0.12                   |
| Subpleural                                                     | 1/64 (1.6)             | 1/29 (3.4)                | 0                             | 0.453                  |

# include 3 patients developed fever newly, 2 fatigue, 17 cough, and 13 vomit or diarrhea after admission. bpm: breaths per min.

**Supplementary Table 3.** Laboratory findings.

| Variable                                   | All patients<br>(n=67) | Severe patients<br>(n=29) | non-Severe<br>patients (n=38) | p-value              |
|--------------------------------------------|------------------------|---------------------------|-------------------------------|----------------------|
| White blood cell count, $\times 10^9/L$    | 5.7 $\pm$ 2.7          | 6.5 $\pm$ 3.5             | 5.1 $\pm$ 1.8                 | 0.061                |
| White blood cell count, $\times 10^9/L$    |                        |                           |                               | 0.056                |
| <4.0                                       | 17/67 (25.4)           | 6/29 (20.7)               | 11/38 (28.9)                  | 0.442                |
| 4.0-10.0                                   | 46/67 (68.7)           | 19/29 (65.5)              | 27/38 (71.1)                  | 0.628                |
| >10.0                                      | 4/67 (6.0)             | 4/29 (13.8)               | 0                             | 0.031                |
| Neutrophil count, $\times 10^9/L$          | 3.9 $\pm$ 2.6          | 4.9 $\pm$ 3.3             | 3.1 $\pm$ 1.5                 | 0.007                |
| Neutrophil rate > 70%                      | 25/67 (37.3)           | 18/29 (62.1)              | 7/38 (18.4)                   | 0.0003               |
| Lymphocyte count, $\times 10^9/L$          | 1.4 $\pm$ 0.6          | 1.1 $\pm$ 0.5             | 1.6 $\pm$ 0.7                 | 0.0007               |
| Lymphocyte rate < 20%                      | 21/67 (31.3)           | 16/29 (55.2)              | 5/38 (13.2)                   | 0.0002               |
| Lymphocyte rate > 40%                      | 11/67 (16.4)           | 2/29 (6.9)                | 9/38 (23.7)                   | 0.097                |
| Monocyte count, $\times 10^9/L$            | 0.4 $\pm$ 0.2          | 0.4 $\pm$ 0.2             | 0.4 $\pm$ 0.1                 | 0.943                |
| Monocyte rate > 8%                         | 31/67 (46.3)           | 9/29 (31.0)               | 22/38 (57.9)                  | 0.029                |
| Red blood cell count, $\times 10^{12}/L$   | 4.3 $\pm$ 0.5          | 4.2 $\pm$ 0.5             | 4.4 $\pm$ 0.5                 | 0.052                |
| Haemoglobin, g/L                           | 135.4 $\pm$ 43.2       | 141.3 $\pm$ 59.7          | 130.9 $\pm$ 24.1              | 0.330                |
| Platelet count, $\times 10^9/L$            | 198.4 $\pm$ 100.4      | 208.4 $\pm$ 127.7         | 190.8 $\pm$ 74.1              | 0.510                |
| Platelet count <100 $\times 10^9/L$        | 4/67 (6.0)             | 3/29 (10.3)               | 1/38 (2.6)                    | 0.308                |
| Alanine transaminase (ALT), U/L            | 49.5 $\pm$ 101.1       | 67 $\pm$ 145.2            | 36.1 $\pm$ 42.8               | 0.218                |
| ALT > 50 U/L                               | 17/67 (25.4)           | 10/29 (34.5)              | 7/38 (18.4)                   | 0.134                |
| Aspartate transaminase, U/L                | 35.5 $\pm$ 27          | 39.6 $\pm$ 24.6           | 32.3 $\pm$ 28.5               | 0.276                |
| Total bilirubin (TBil), $\mu\text{mol}/L$  | 14.9 $\pm$ 6.3         | 15.8 $\pm$ 6.9            | 14.3 $\pm$ 5.8                | 0.329                |
| TBil > 17.1 $\mu\text{mol}/L$              | 19/67 (28.4)           | 9/29 (31.0)               | 10/38 (26.3)                  | 0.671                |
| Albumin (Alb), g/L                         | 40.2 $\pm$ 4.7         | 37.9 $\pm$ 5.2            | 42 $\pm$ 3.5                  | 0.0006               |
| Alb < 35 g/L                               | 9/67 (13.4)            | 8/29 (27.6)               | 1/38 (2.6)                    | 0.008                |
| Sodium, mmol/L                             | 137.9 $\pm$ 3.4        | 137.1 $\pm$ 4.1           | 138.5 $\pm$ 2.7               | 0.122                |
| Potassium, mmol/L                          | 3.9 $\pm$ 0.5          | 3.8 $\pm$ 0.5             | 4.1 $\pm$ 0.5                 | 0.007                |
| Fasting blood glucose, mmol/L              | 6.5 $\pm$ 1.6          | 7.2 $\pm$ 2.1             | 6 $\pm$ 1                     | 0.014                |
| Creatinine, $\mu\text{mol}/L$              | 72.3 $\pm$ 31.7        | 71 $\pm$ 19.2             | 73.3 $\pm$ 38.8               | 0.767                |
| Creatine kinase (CK), U/L                  | 142.9 $\pm$ 218.7      | 183.8 $\pm$ 312.8         | 111 $\pm$ 90.8                | 0.242                |
| CK > 170 U/L                               | 14/65 (21.5)           | 8/28 (28.6)               | 6/36 (16.7)                   | 0.253                |
| Lactate dehydrogenase (LDH), U/L           | 266.2 $\pm$ 124.5      | 334.3 $\pm$ 144.4         | 214.2 $\pm$ 73.9              | 0.0002               |
| LDH > 245 U/L                              | 29/67 (43.3)           | 23/29 (79.3)              | 6/36 (15.8)                   | 2.0 $\times 10^{-7}$ |
| Prothrombin time, sec.                     | 12.1 $\pm$ 1           | 12.1 $\pm$ 1.3            | 12 $\pm$ 0.8                  | 0.652                |
| D-dimer, mg/L                              | 1.2 $\pm$ 6.9          | 2.4 $\pm$ 10.3            | 0.2 $\pm$ 0.2                 | 0.269                |
| D-dimer > 0.5 mg/L                         | 13/67 (19.4)           | 9/29 (31.0)               | 4/38 (10.5)                   | 0.035                |
| International normalized rate              | 1.0 $\pm$ 0.1          | 1.0 $\pm$ 0.1             | 1.0 $\pm$ 0.1                 | 0.698                |
| C-reactive protein (CRP), mg/L             | 29.5 $\pm$ 40.1        | 45.2 $\pm$ 47             | 17.5 $\pm$ 29.2               | 0.008                |
| CRP > 10 mg/L                              | 36/67 (53.7)           | 22/29 (75.9)              | 14/38 (36.8)                  | 0.002                |
| Procalcitonin, ng/mL                       | 0.13 $\pm$ 0.53        | 0.23 $\pm$ 0.79           | 0.06 $\pm$ 0.11               | 0.272                |
| Erythrocyte sedimentation rate (ESR), mm/h | 42.8 $\pm$ 26.5        | 54.8 $\pm$ 24.4           | 33.2 $\pm$ 24.4               | 0.002                |
| ESR > 20 mm/h                              | 43/67 (64.2)           | 24/29 (82.8)              | 19/38 (50.0)                  | 0.006                |

Data are mean (standard deviation) or n/N (%), where N is the total number of patients with available data.

**Supplementary Table 4.** Complications, Treatments, and Clinical Outcomes.

|                                                                 | All patients<br>(n=67) | Severe patients<br>(n=29) | non-Severe<br>patients (n=38) | p-value               |
|-----------------------------------------------------------------|------------------------|---------------------------|-------------------------------|-----------------------|
| <b>Complications</b>                                            |                        |                           |                               |                       |
| Acute respiratory distress syndrome                             | 7/67 (10.4)            | 7/29 (24.1)               | 0                             | 0.002                 |
| Septic shock                                                    | 3/67 (4.5)             | 3/29 (10.3)               | 0                             | 0.076                 |
| Acid base disturbance                                           | 3/67 (4.5)             | 2/29 (6.9)                | 1/38 (2.6)                    | 0.574                 |
| Electrolyte disorder                                            | 7/67 (10.4)            | 7/29 (24.1)               | 0                             | 0.002                 |
| Respiratory failure                                             | 14/67 (20.9)           | 14/29 (48.3)              | 0                             | 1.47×10 <sup>-6</sup> |
| Bacterial infection                                             | 15/67 (22.4)           | 13/29 (44.8)              | 2/38 (5.3)                    | 1.18×10 <sup>-4</sup> |
| multiple organ dysfunction syndrome                             | 3/67 (4.5)             | 3/29 (10.3)               | 0                             | 0.076                 |
| Liver injury*                                                   | 19/67 (28.4)           | 11/29 (37.9)              | 8/38 (21.1)                   | 0.129                 |
| Kidney injury                                                   | 2/67 (3.0)             | 2/29 (6.9)                | 0                             | 0.184                 |
| Secondary immunodeficiency                                      | 6/67 (9.0)             | 6/29 (20.7)               | 0                             | 0.005                 |
| <b>Treatment</b>                                                |                        |                           |                               |                       |
| Antiviral therapy                                               | 67/67 (100)            | 29/29 (100)               | 38/38 (100)                   | 1.000                 |
| IFN-α 1b                                                        | 2/67 (3.0)             | 0                         | 2/38 (5.3)                    | -                     |
| IFN-α 1b + ribavirin                                            | 1/67 (1.5)             | 1/29 (3.4)                | 0                             | -                     |
| IFN-α 1b + lopinavir/ritonavir                                  | 51/67 (76.1)           | 24/29 (82.8)              | 27/38 (71.1)                  | -                     |
| IFN-α 1b + lopinavir/ritonavir + ribavirin                      | 11/67 (16.4)           | 4/29 (13.8)               | 7/38 (18.4)                   | -                     |
| IFN-α 1b + lopinavir/ritonavir + darunavir/cobistatit           | 1/67 (1.5)             | 0                         | 1/38 (2.6)                    | -                     |
| IFN-α 1b + lopinavir/ritonavir + darunavir/cobistatit + arbidol | 1/67 (1.5)             | 0                         | 1/38 (2.6)                    | -                     |
| Oxygen support                                                  | 45/67 (67.2)           | 29/29 (100)               | 16/38 (42.1)                  | 5.74×10 <sup>-7</sup> |
| Nasal cannula                                                   | 31/45 (68.9)           | 15/29 (51.7)              | 16/16 (100)                   | -                     |
| Mask oxygen inhalation                                          | 3/45 (6.7)             | 3/29 (10.3)               | 0                             | -                     |
| Non-invasive ventilation                                        | 6/45 (13.3)            | 6/29 (20.7)               | 0                             | -                     |
| Invasive ventilation                                            | 5/45 (11.1)            | 5/29 (17.2)               | 0                             | -                     |
| Antibiotic therapy                                              | 19/67 (28.4)           | 15/29 (51.7)              | 4/38 (10.5)                   | 2.10×10 <sup>-4</sup> |
| Use of corticosteroid                                           | 9/67 (13.4)            | 9/29 (31.0)               | 0                             | 2.34×10 <sup>-4</sup> |
| <b>Prognosis at data cutoff</b>                                 |                        |                           |                               | 0.009                 |
| Hospitalisation                                                 | 21/67 (31.3)           | 14/29 (48.3)              | 7/31 (22.6)                   | -                     |
| Discharge                                                       | 46/67 (68.7)           | 15/29 (51.7)              | 31/38 (81.6)                  | -                     |

IFN: Interferon. \*Liver injury refers to those with alanine transaminase >2 times and/or total bilirubin >2 times of upper limit of normal. Data are n/N (%), where N is the total number of patients with available data.
